# Supplementary material for: Photocontrol of electron transfer from Zn-porphyrin to an axially bound stilbazole–pyromellitic diimide conjugate
Source: Royal Society of Chemistry journal article supplement (doi:10.1039/b403991b), 2004-01-01
Supplement: b403991b.doc [file b403991b.doc]

Electronic Supplementary Information

for

Photocontrol of electron transfer from Zn-porphyrin to an axially bound stilbazole–pyromellitic diimide conjugate

Joe Otsuki,* Atsushi Suka, Katsutoshi Yamazaki, Hideyuki Abe, Yasuyuki Araki and Osamu Ito

**Preparation of 1.** This compound was prepared according to Scheme S1. A solution of pyromellitic dianhydride (0.22 g, 1 mmol) in DMF (15 mL) was added to a solution of 4-(2-pyridin-4-ylvinyl)benzylamine1 (0.21 g, 1 mmol) and hexylamine (0.10 g, 1 mmol) in DMF (10 mL). The mixed solution was heated at 70 ˚C for 7 h and then refluxed for 12 h. After the precipitated solid was removed, the solvent was evaporated. The residue was chromatographed on a silica gel column using CH2Cl2/MeOH (79/1) as eluent. The obtained material was reprecipitated using CH2Cl2 and MeOH to afford a white solid (50 mg, 10%). 1H NMR (CDCl3): ** = 8.57 (2H, d, *J* = 2.0 Hz, ArH), 8.28 (2H, s, ArH), 7.51 (2H, d, *J* = 8.0 Hz, ArH), 7.47 (2H, d, *J* = 8.0 Hz, ArH), 7.35 (2H, d, *J* = 6.4 Hz, ArH), 7.26 (1H, d, *J* = 16.0 Hz, ArCH=), 6.99 (1H, d, *J* = 16 Hz, ArCH=), 4.91 (2H, s, CH2), 3.73 (2H, t, *J* = 8.0 Hz, CH2), 1.69 (2H, q, *J* = 7.2 Hz, CH2), 1.31 (6H, (CH2)3), 0.88 (3H, t, *J* = 6.8 Hz, CH3). HRMS: calcd for C30H27N3O4, 494.2080; found, 494.2082. Anal. Calcd: C, 73.01; H, 5.51; 8.51. Found: C, 72.81; H, 5.54; N, 8.22.

**Scheme S1.**

**Titration of ZnTPP with *trans*-1.** Incremental amounts *trans*-**1** was added to a 10 M solution of ZnTPP in toluene at 25 ˚C, and the absoption spectra recorded as shown in Fig. S1a. The increase around 300 nm is due to *trans*-**1**. The red-shift in the Soret and Q-bands of ZnTPP indicates that axial coordination of *trans*-**1** to ZnTPP is ocurring. A home-made least-squares curve-fitting program based on the literature2,3 was used to evaluate the binding constant (Fig. S1b).

**Fig. S1.** Titration of ZnTPP with *trans*-**1**. (a) Changes in absorption spectrum. (b) Changes in absorbance at 550 nm. Dots are observed points while the solid curve is calculated based on the 1:1 binding.

1 S. Wehrens and G. Tomaschewski, *React. Funct. Polym.*, 1996, **29**, 21.

2 J. R. Long and R. S. Drago, *J. Chem. Educ.*, 1982, **59**, 1037.

3 I. Hormon and B. Dreux, *Helv. Chim. Acta*, 1984, **67**, 754.
